# Supplementary material for: A Xenobiotic Detoxification Pathway through Transcriptional Regulation in Filamentous Fungi
Source: PubMed Central journal article supplement (PMC6050962; doi:10.1128/mbio.00457-18), 2018-07-17
Supplement: mbo004183984s1.pdf [file mbo004183984s1.pdf]

## Supplemental Materials and Methods

**Volcano plot for RNA-seq.** From the 12,008 genes identified in the transcriptomic analysis, 9,499 genes were found to have FPKM values equal to or above 0.05. These 9,499 genes were plotted using csVolcano from cummerbund, significant genes defined by  $\alpha = 0.05$ .

**Heterologous expression of ABC transporters.** The galactose-inducible expression vector pYES2 (Invitrogen) containing the full-length cDNA sequences of *ShatrD* (TCONS\_00024506) was transformed into a drug-hypersensitive *Saccharomyces cerevisiae* mutant (AD12345678:AD1-8) (1) to generate two independent mutants (AD1-8:atrD-1 and -2). The ShPDR1 expressing yeast mutants (AD1-8:PDR1-1 and -2) and the control yeast mutant containing the empty pYES2 vector (AD1-8-pYES2) generated by Sang *et al.* (2) were used in this study. The yeast spot assay of the ShPDR1 and ShatrD expressing yeast mutants and empty vector mutant was conducted by the method described in Sang *et al.* (2). Briefly, 5  $\mu$ L of cell suspension from each yeast mutant culture at 0.5 OD<sub>600</sub> were spotted onto bacto-yeast nitrogen base (YNB) agar medium lacking uracil, containing 2% galactose and amended without and with fungicides and plant growth regulators (PGRs). The name of chemicals and their concentrations are as follows: propiconazole (0.005  $\mu$ g mL<sup>-1</sup>), iprodione (500  $\mu$ g mL<sup>-1</sup>), boscalid (200, 500, and 750  $\mu$ g mL<sup>-1</sup>), fluxapyroxad (500  $\mu$ g mL<sup>-1</sup>), flurprimidol (25  $\mu$ g mL<sup>-1</sup>), paclobutrazol (0.1  $\mu$ g mL<sup>-1</sup>), and fludioxonil (250, 500, and 750  $\mu$ g mL<sup>-1</sup>). The sensitivity of yeast mutants to respective fungicides and PGRs was qualitatively assessed after incubation at 30°C for 3 days (iprodione and fludioxonil), 4 days (flurprimidol), and 6 days (untreatment, propiconazole, fluxapyroxad, paclobutrazol, and boscalid). Two biological replicates and three technical replicates per biological replicate were performed for each mutant and treatment.

**Probabilistic variant detection.** To identify variants between 78 putative fungal specific Zn<sub>2</sub>Cys<sub>6</sub> transcription factors from the MDR strain HRI11 and sensitive strain HRS10, Map Reads to Reference and Probabilistic Variant Detection on the CLC Genomics Workbench 6 software (Qiagen CLC Bio) were conducted. 78 transcripts from HRI11 were mapped to 78 transcripts from HRS10 and the mapped result was used for Probabilistic Variant Detection analysis. The filtering resulted in variants with following characteristics: i) no ignore non-specific matches, ii) minimum coverage = 1, variant probability = 10, required variant count = 1, and iii) maximum expected variants = 1 and genetic code = 1 standard. These filter criteria resulted in identifying 4 variants, TCONS\_00003992 (T2558C), TCONS\_00016457 (T891G, C2268G), TCONS\_00003660 (G272C).

**Phylogenetic Analysis.** The amino acid sequences of *S. homoeocarpa* CYP561, CYP65, and CYP68, its putative orthologs in select fungal species from Basic Local Alignment Search Tool (BLAST) in Fungal Cytochrome P450 Database (FCPD: <http://p450.riceblast.snu.ac.kr>) and National Center for Biotechnology Institution (NCBI), CYP561, CYP65, and CYP68 in select plant and animal from FCPD, and reported CYP65 and CYP68 genes involved in biosynthesis of secondary metabolites (3-7) obtained from GenBank were used for the phylogenetic analysis. MAFFT v7.110 was used to align amino acid sequences with automated strategy selection and BLOSUM62 scoring matrix parameters (8). Neighbor-joining phylogenetic analysis was conducted using MEGA v5 with the aligned amino acid sequences with the Poisson model, gamma distributed rates among sites, complete deletion of missing data, and 1,000 bootstrap

replicates (9). For phylogenetic analysis of ShXDR1 orthologs, the amino acid sequences of ShXDR1, its putative orthologs in select fungal species identified from the BLAST in NCBI, and the reported transcription factors involved in multidrug resistance (10-13) obtained from GenBank were used for the phylogenetic analysis. The alignment and neighbor-joining phylogenetic tree were performed followed by the aforementioned methods.

**Silencing of *ShXDR1* by expression of double stranded RNA.** Each sense and antisense fragment (nucleotides 71-270) of *ShXDR1* amplified from cDNA of strain HRI11 was inserted into the plasmid pFGC1008 (Arabidopsis Biological Resource Center, Columbus, OH, USA). The sense and antisense fragment from plasmid pFGC1008 was inserted into plasmid pYHN3-ptpC to generate the plasmid pYHN3-ptpC-dsRNAXDR1 that constitutively overexpresses hairpin double stranded RNA (dsRNA) of target sequences of *ShXDR1*. The plasmid DNA (8  $\mu\text{g}$ ) was transformed into protoplasts from strain HRI11 using a PEG-mediated transformation system (14). *In vitro* sensitivity tests of two selected transformants (HRI11(dsRNA-XDR1)-1 and -2), HRS10, and HRI11 to propiconazole (1  $\mu\text{g ml}^{-1}$ ), iprodione (3  $\mu\text{g ml}^{-1}$ ), boscalid (1000  $\mu\text{g ml}^{-1}$ ), and flurprimidol (15  $\mu\text{g ml}^{-1}$ ) were conducted. The expression of *CYP56I*, *CYP65*, *CYP68*, *ShPDR1*, *ShatrD*, and *ShXDR1* was quantified in the aforementioned four strains before and after treatment of propiconazole (1  $\mu\text{g ml}^{-1}$ ) for 40 min.

**Knock-out of ShXDR1 by a CRISPR-Cas9 system.** Two vectors p415-PtpC-Cas9-TtpC-CYC1t (Addgene Plasmid #68059) and p426-SNR52p-gRNA.csr-1.Y-SUP4t (Addgene Plasmid #68060) were used for a CRISPR-Cas9 system (15). The vector p426-SNR52p-gRNA.csr-1.Y-SUP4t was modified by insertion of target sequences (5'-GCGAACAGACCTGGGTATGTGG-3') from *ShXDR1* gene sequences using two-round PCR. Two fragments were amplified from the vector p426-SNR52p-gRNA.csr-1.Y-SUP4t using two primer sets (F\_NheI\_SNR52p and R\_gRNA\_XDR1; F\_gRNA\_XDR1 and R\_KpnI\_CYC1t). Two fragments that are overlapped the target sequences were used as PCR templates to amplify one fragment using F\_NheI\_SNR52p and R\_KpnI\_CYC1t. The resultant fragment and the vector p426-SNR52p-gRNA.csr-1.Y-SUP4t were digested by restriction enzymes NheI and KpnI and the purified insert and linearized vector were ligated to generate p426-SNR52p-gRNA.ShXDR1.Y-SUP4t. For the split-marker approach, two constructs (One with 1 kb of upstream region of the *ShXDR1* and 731 bp of hph and one with 1 kb of downstream region of the *ShXDR1* and 1126 bp of PtpC-hph) were amplified using two primer sets F\_upXDR1/R\_YG and F\_HY/R\_downXDR1 from the vector Topo- $\Delta$ ShXDR1 (donor vector DNA). Before *S. homoeocarpa* transformation, four different ways of DNA constructs were prepared: donor vector DNA only (5  $\mu\text{g}$ ), donor vector DNA (5  $\mu\text{g}$ ) + p415-PtpC-Cas9-TtpC-CYC1t (5  $\mu\text{g}$ ) + p426-SNR52p-gRNA.ShXDR1.Y-SUP4t (5  $\mu\text{g}$ ), split marker constructs only (each 2.5  $\mu\text{g}$ ), split marker constructs (each 2.5  $\mu\text{g}$ ) + p415-PtpC-Cas9-TtpC-CYC1t (5  $\mu\text{g}$ ) + p426-SNR52p-gRNA.ShXDR1.Y-SUP4t (5  $\mu\text{g}$ ). Hygromycin-resistant transformants were obtained 4-10 days after incubation. The hyphal-tip of transformants was transferred to PDA containing hygromycin B (100  $\mu\text{g ml}^{-1}$ ). *In vitro* sensitivity test of the transferred transformants to the DMI fungicide (propiconazole) was conducted. The transformants and strain HRI11 were grown on PDA for 3 days and an agar plug (5 mm) of each strain from the edge of colonies was placed on PDA and propiconazole (1  $\mu\text{g ml}^{-1}$ ) amended PDA. After 2 days of incubation at 25°C, the number of transformants grown or not grown on propiconazole amended PDA was counted. The expression of *ShatrD* was quantified in strains HRI11, Trans1, and Trans 2 before and after treatment of propiconazole (1  $\mu\text{g ml}^{-1}$ ) for 40 min.

## REFERENCES

1. Decottignies A, Grant A, Nichols J, de Wet H, McIntosh D, Goffeau A. 1998. ATPase and multidrug transport activities of the overexpressed yeast ABC protein Yor1p. *J Biol Chem* 273:12612-12622.
2. Sang H, Hulvey J, Popko JT, Lopes J, Swaminathan A, Chang T, Jung G. 2015. A pleiotropic drug resistance transporter is involved in reduced sensitivity to multiple fungicide classes in *Sclerotinia homoeocarpa*. *Mol Plant Pathol* 16:251-261.
3. Hu X, Xiao G, Zheng P, Shang Y, Su Y, Zhang X, Liu X, Zhan S, Leger RJ, Wang C. 2014. Trajectory and genomic determinants of fungal-pathogen speciation and host adaptation. *Proc Natl Acad Sci U S A* 111:16796-16801.
4. Bömke C, Rojas MC, Gong F, Hedden P. 2008. Isolation and characterization of the gibberellin biosynthetic gene cluster in *Sphaceloma manihoticola*. *Appl Environ Microbiol* 74:5325-39.
5. McCormick SP, Harris LJ, Alexander NJ. 2004. Tri1 in *Fusarium graminearum* encodes a P450 oxygenase. *Appl Environ Microbiol* 70:2044-2051.
6. Kimura M, Tokai T, O'Donnell K, Ward TJ. 2003. The trichothecene biosynthesis gene cluster of *Fusarium graminearum* F15 contains a limited number of essential pathway genes and expressed non-essential genes. *FEBS Lett* 539:105-10.
7. Tudzynski B, Höltner K. 1998. Gibberellin biosynthetic pathway in *Gibberella fujikuroi*: evidence for a gene cluster. *Fungal Genet Biol* 25:157-170.
8. Katoh K, Toh H. 2008. Recent developments in the MAFFT multiple sequence alignment program. *Brief Bioinform* 9:286-298.
9. Tamura K, Peterson D, Peterson N, Stecher G, Nei M, Kumar S. 2011. MEGA5: molecular evolutionary genetics analysis using maximum likelihood, evolutionary distance, and maximum parsimony methods. *Mol Biol Evol* 28:2731-2739.
10. Kretschmer M, Leroch M, Mosbach A, Walker A-S, Fillinger S, Mernke D, Schoonbeek H-J, Pradier J-M, Leroux P, De Waard M, Hahn M. 2009. Fungicide-driven evolution and molecular basis of multidrug resistance in field populations of the grey mould fungus *Botrytis cinerea*. *PLoS Pathog* 5:e1000696.
11. Thakur J, Arthanari H, Yang F, Pan S-J, Fan X, Breger J, Frueh D, Gulshan K, Li D, Mylonakis E, Struhl K, Moye-Rowley W, Cormack B, Wagner G, Näär A. 2008. A nuclear receptor-like pathway regulating multidrug resistance in fungi. *Nature* 452:604-609.
12. Plesken C, Weber RWS, Rupp S, Leroch M, Hahn M. 2015. *Botrytis pseudocinerea* is a significant pathogen of several crop plants but susceptible to displacement by fungicide-resistant *B. cinerea* strains. *Appl Environ microbiol* 81:7048-7056.
13. Coste A, Turner V, Ischer F, Morschhäuser J, Forche A, Selmecki A, Berman J, Bille J, Sanglard D. 2006. A mutation in Tac1p, a transcription factor regulating *CDR1* and *CDR2*, is coupled with loss of heterozygosity at chromosome 5 to mediate antifungal resistance in *Candida albicans*. *Genetics* 172:2139-2156.
14. Sang H, Popko J, Chang T, Jung G. 2017. Molecular mechanisms involved in qualitative and quantitative resistance to the dicarboximide fungicide iprodione in *Sclerotinia homoeocarpa* field isolates. *Phytopathology* 107:198-207.
15. Matsu-ura T, Baek M, Kwon J, Hong C. 2015. Efficient gene editing in *Neurospora crassa* with CRISPR technology. *Fungal Biology and Biotechnology* 2:1.

## Sequence information

>upstream\_ShXDR1\_HRI11

TTGTCATCTCTTACGGGAATTTTAATGATCTGTTGGATAAATAGACGCCACCTTGTAGT  
GTTGGGCGAAAGGCCAGGGCCTGATATCAGATGTACCGATAAAAGATAATGTCTTTCC  
ATGTATGAAACCTCGGATGTAATTCCTGAAGTCTTAGTGCATTGAGCGTTGTGATGTTT  
TCCAATTCGGCCATTTCAAAGGATGATGGAGCGTAGAGCTTGGTCTTACACAAAA  
CACGATGGTGACTATGTATGTGAGAACCTGTGAGGATTCATGGCTTTGGGTCCATGCG  
GGGAGCTTCAAAGCCCGAATTGGTAATTGTGATAATCTCCTTATCGCCGAAGAAAGTC  
TTCCGCTTGTTCAGTAGTGTACAGATCGAACCTGGAAGGTAATCATTGGCCAAAG  
AAGATTTGCATCGACCCCACTGAAGTCGATGGCGTCTATCTAGAATGTCACATCAATAT  
GCAAGTTGACGATTACCAAGGTTTGGTCACAAGTAGCAAGTAGAACGAAGAATGAAT  
GAGAATATACGGATGATCGTTCCGAATATCTCGAAGTATGCAAATCATCAGTCTCGTGT  
GCCATGCGAATAAGGAGATGTTTCGTCCTCATGTGTTGAATTTTGTAATCTTTGCAGCT  
CAGTATCGATTCCCAGTTCAGCCCGCTTTAACTTTATTTTCGACATCTCTAGTAGATGTT  
GGTGTGAGAGATGACGCCGTAATGTCTGCTGAGGTATGGAATGAGACGAGGGCAA  
CAGACTGTGTCAGATATTGTTTCCTTTTTATAACCACTGGTGTAGTAGTATATATTTCCGG  
CACATTACATTGTAGCCTGCGCCCCTATTTTCATCTCCTCAGGTCTTGCAGGAGTCTAGA  
TGTATGCTTATGAAGAATCGTTGCTCCACGGATCAGTAGTCGTATTGGATATCTTTTGC  
GCCGACTTAGCTGCTCCCCCTACTCACCTGCCATGCTACGCATGTAACATTCGATGTT  
GTGAAAGCAGAATTTCTCTCAGCGATTCTTCTATCCGTCTAAAATATTAATGCTTGTCT  
AATTTCTTTTACATTCTTTTACATTCTGAGTGAATTTCTGACTAGAACATTAATAATAGTC  
CATTTTGCGTCAAGTAACCGCTTTTTAGTTGCAGCACCCTAATCCCACCTCCGAAAC  
GGAGGACCAACCAACGACCCCTCCAATCCACAGTACAGTCAGTACTCGCTGCCAG  
GTACCTTGAGCTTCCGAGCCTGGTTGCGACTTTTACTTTTCAGCACGACGACACACCTG  
AGAGCAGGTCAACCTTTGTAAAGATCTGTACTCGTCATCAGCCCCGCCGCAGCATTC  
ACAATCAATACCTTGTGCACAAAAACACCAGGGGAGCCAAGGCAGTTGGGTGGAAA  
CATTGCGGAAATTCAGCCATACTCCGTGTCCTAGCGATTGTGACCTCACGAAGAGTTG  
TACGAATACGAACTGCATCATTCTGTCAGTGCACAGGTAATTTGACCGGATTTCTGA  
AGGACTTAACGCAGTCTCTCACAAACGTCAACAATACACTTCAAATACTATGCGATAA  
TTAGTG

>ShXDR1\_HRI11

ATGATGGACTCCATGCATCGTGAAAGGAATTCCTTTCATTCCCCAGATTTTCAGCGCCGC  
CTTTGATGAACCCCCACCACAGATCTTCGGGGCTTACACTGCAGATGGCATGCCGAT  
GTCCTCGACGTTACCTGACATGAGTGGGCCGCTTTTTGGAGATGGCACCCCTTCTCGAC  
GAGAGTAATGAAGCGAAGCGGAGAAGAATAGCTAGAGTACGACAAATGCCTGATGG  
AAGGAGAGTGGTTCATGACTGACGATGGCAGGCTTGTGATATGTGTAGGAAGAAAA  
GATTAAATGCGATGGAAAACCTACCCGCTTGTACGCACTGTATCAACTACAAAACGGAA  
TGTGTTTTTACACAAGTTGAGAAGAAGAGGAACCCGCCGAAAGGGTAAGCAAATTG  
AGAACAATACACAGTATATCGCTAACTCCTGGACAGAGCAAATATATCGAAGGTCTA  
GAAAATCGTCTGGGACGCATGGAAAGTTTGTGCTGCGGCTGTCTGGTTTTGTCTACCAATT  
CCCATGCGCATAAGAGCCGACAACATCATAGTTGCTCACACATTTCAAAGGACTCCTC  
AACGAAGACGATAATGGGCGAACAGACCTGGGTATGTTGGAGAAGAAATTACAGGAT  
AGGAATCAATCACGGAGAACATCTGCTGTACCAGGATCAAATCCCACATCTCCGGAA  
CAAAGTACCCAGGCCATAACGACGGCAATGCCTCGACACCCCGCAGCGCCATGGCA

TCACCAGAACCGCAAAGTAAAGATAAGGAGAAGCGAAATAGCAAAGATAGCAAAGA  
TGGACGCAGTGAGAATAACGAAGAGCCGGTAGAAGCACTTTCTGATATGATGTGTTC  
CCTGGTTACAAATAACTGTGGAGAACTAGATACATAGGTATGCAGTGGACTGCATAG  
CAGCGGACTCTACTGACTGTGATAGGATCATCTTCCGGCTTCTCTATCTTCTCCCGAA  
AGGTATCCAATGGGTCAATGAAAAAACCGGCGATTCGTCCTTCCAAGAAATGATATCG  
TCCGCTTCAGTCGACGACAATAAGTCGATGTACTGGAAGCCAGAAGTGTTTCGCTGAT  
TTGTTCCACCGACCAGTCTTCAAACAGCTACCCCCCAAAAACGAATGTATATCACTGC  
TGAAAGACTTTTTTCGAGAATTTCAATTGCATGTTTCCGCTTTTTTCATCAACCAACGTTT  
ATGCATCTTGTCGAACGGCAATATTCCCCCGATCCATAACCAGGGTTCTGGATGGTGGG  
CTAGTCTCAATTGTGCGCTTGCTATTGCTCATCGCCTTCGTGTTATGAGCCACCTAGTA  
CCAAAAGATGAAGATACAAAGGCCTGGGGTTACCTGAAGAATGCGATGGGTGTATTT  
ACGGAATTA ACTATGCGGAACACGGACCTTCTCAGCGTGCAGGCACTTTTGGGCATG  
GCATTGTTTATGCAGGGCACGCCTAATCCTCAGCCATCCTTCTTTCTTGTAGCAGCTGC  
CATTTCGGTTATCGCATAGTATCGGACTCCACAAACGAGGTTCTGGCTTCAACCTGAAC  
CCGGTAGAGATCGAGCAACGAAAACGAGTTTTCTGGATTGGTTATATGTTAGACAAG  
GATATCTGTCTGCGATCTGGACGACCGCCTGCACAAGATGACGATGATATGAATGTTG  
AGCTACCTAGCGCTGATCCAGATGACAACATTGGCAATATTCCTTTGGCAGATGGAAA  
GGGCAAGGTCAACCTTTTCCGATTGATGTGCGAATTTGCGACCATTGAAAGCAAAGT  
CTACAAACA ACTTTACTCTACCAAAGCCTCGAAGCAGTCCGATGGAGA ACTCCTAAA  
CACTATCGGCGAGCTAGATCACGAGCTTGAAGAATGGAAAGATAGCATTCCCGTTGAT  
TTCCGCCCAGAACATGAGATTAAAGCTTACACACACCCTTGATCCTCCATGTTGTGCG  
TCCTTCATTTTGCTTACTACA ACTGTCTTACTACTATTTCATCGAATGTCTGTACATCATG  
GGTACTGGACAAGTCGACTTTCCAATTATGCTATT CAGGGTCTCAACGCTAGCCCCCT  
AAATCCTCGGGTATTTTCTTCTGCAGCTTTGTGTGTTTCTGCTGCTCGCGCCTCCATCC  
ATCTCATCAAATATGTTCCCTCAGGGGAGACTTCGCTTGTGTCTGGTAAGTCGCATGACA  
ACCGGCTATGTTGGGGACTAACTAACAACCGTAGGGCTTATTCTCTACTTTCCCTGTTTC  
TGCATTAGT GACTCTTTTTCGGAATATTCTACAAAACCTCAAGATCCAAGGGCTCGC  
TCTGATGTACGCCTGATGAACCTTGTTGTAAACTTTCTTTCTATGCTAGGGCGCCGAAG  
AAGAAAACGGAGGCGTCAAACGCATGCTAGGAGTCTGCTCAGAGTTCGAGAGGATT  
GCAAAGGTCGTTCTCGACAAAGCGGAAAAGGAGACATCTTCGAGGAGGAAACGCAA  
GAGCCATGATGGTCATAACCAATCCTCACATATCTCGAGAGCCAGCCAACCGCAGAC  
ACCAATAATGAACCACTCTCAGACACCAATGTCTGGAGTCATCTCGCCTAACATGTCC  
AGCCATCTTAATCCTCATAATGGTTTCAGTCCCATTCAAGGCTCGCCGAATTCAAATTG  
GCAGCCGGATTTACACAGTACTGGAGGTGATTATATGGGGTCAGCTGGCACAACATTT  
GAGGACATGCACGGGTTTACAAATGGCAACGATGCCAATTCACCACTTAATCTTAATG  
CTTCCAGCAACCATTTGTTCCACAAGATTTATGGCAAATGCCACGACCATAGAATG  
GGACTGGGCTGAAATGACCGGAGGCGCATACCAAAGTTTCGAGAATGGAATTGTGGG  
TGACCCGGAGCTGCATATGAACAACAATTTACACTTGCAACATCAAGGTGGAATGTAA  
>downstream\_ShXDR1\_HRI1  
GAGTTCGGTTTTAGCATTGTATATTTTGGGCTGCGAGGCAACGGTGTTCtAGGGGCATT  
TGACACTAAGGACGATGGATCATGAAGAACGGATTAACGGCTTAGGAAGCAATTGCC  
ATTGCATGGAATGAGGCGCATTTACTAGAACTCGTTTGGCTCGAGATGTTtGCTTTTT  
CCCTCTCGTAAATCGGTGGGAGGGTGGGAGGATGGCATGGCTGTACACTAACTATGA  
CTCTCCTCAGATATTTGTACTGCGGCCCTGAGGGGCTTGCCAAGCACTGTAGTAATG  
ATATATTGGTATTATAAACCCGCAGATTGCTCTTCAATTATGATAATATTTAAGTCTAAA  
AACTGTGTCTACACATATCAATCACTTGAATCACATCATTAAATATTATAAGGATAAAA

GCTTGGTTTGTAAATTGAGGGCATGTCAAAAAGCTCGTTGGATGTATTTTGCTTCTAGACC  
TGACAAAGTTGCGCTAGTGGTCGCTTTCACATAATCAAGTGGCCCTGCACATAATCAAG  
ACATCATTGCGGAAATCGAACCGACATTGCCTTCCACCACTAACTCCGAAGTCAACG  
AGGACCTCTTCCAATCTATCCC GCGAGTCTATGAAATAGTGGTCAAAGTCACTGAAAG  
ATACGAGACAGTGACTTGAATCCTCTTCTTTCCTTTCAAATACAACCAGCAGCTCTAGC  
CAAGCATGACATCCATGTTACGGCAATCGAGCAATCTTGCTAGAATTTCTCATGCCAC  
CATTCAATCCGCTGCACGGAGTTCCTTTCGCACATCATCTCATGCGCCTCTACTGAGTT  
CGCGTTACTCGCACAAAAGGTGCGCGCCTACTCTTCGAATTTTAATCAACCAAAGA  
AAGATGGACGTGAGGTAGAATCAAGGAAGAAGACGCCTACGCCGTCTTCCAAGTCG  
GCTCCTGGGACGGAAAATCTTTACAATGGAAAAACACCTTTGTCGAACCGGGACGAG  
AATGCGAAGAGTTCAGAGGAAAATGAGACACCATTAGATGAAGGCATGGTTAGGTTG  
ACGGAGGAGGAGCTGAAGGAATTAGAA

>ShatrD\_HRI11

ATGGCGACCTCGACACCCTTTGAGGTTTTGCCTCAAAGTGAGGCAGTGGCCCATAAA  
ATTGAGGAGGTTGTTGAGTCGAAAGTAGAGACATCTTCCAATCATGAGCGGAAGGTC  
AGTGATACAGGCTCCTCGACGTTGGGTTCCATTGCAGAAGAAGATACTGCTGTTTCGTG  
AACTGGCCAGACGCATCACTCAACAGTCAAGGGGATCCGACGATGGCCAGCATCATA  
TCAATCCTTTCTTTGGATCGGATGATCCCACTCTCGACCCATCATCTGAAAAGTTTAA  
TCTAGAGCTTGGGTTAAGAATCTTGTTCAAATCCAGTCTAGGGACCCCGAAAGATATC  
CTAATCGAACAGCCGGAGTCGCCTACAAGA ACTTGAACGCTCACGGATTTCGGAGTAG  
CAACGGATTACCAGAAGACTTTCGGAAACTACCCATTGGAAATCGCTGGCATGGCTA  
AAAGGATTCTTGGTGTGAGCAAGCAAACCAAGATTCAGATCTTGAGGGACTTTGATG  
GGCTAATCAGAAGTGGCGAGATGCTTGTGTGCTCGGAAGACCAGGTTTCAGGCTGCT  
CAACTTTACTCAAGACTATCTCTGGAGAGACTTCGGGTTTCCACGTTGACAAGGATAC  
CTACATTA ACTACCAAGGTATTCCAATGAAGACAATGCACAAGGATTTTCAGGGGAGA  
GTGTATCTACCAAGCAGAAGTCGATGTTCACTTCCCTCAATTGACGGTATCGCAA ACT  
TTGGGCTTCGCAGCACAAAGCTAGAGCCCCTCGAAACCGTATGCCCGGAGTATCGAGG  
AAAGTTTACGCTGAGCATCTGCGCGACGTCATTATGGCAACCTTCGGACTTAGCCACA  
CCTTCAACACTAAAGTTGGCAACGATTTCAATTCGTGGTGTGAGTGGTGGTGAAGAA  
AGCGTGTGAGTATCGCAGAAGCAGCCTTGGGTGGCAGTCCTCTACAATGTTGGGACA  
ACAGTACTAGGGGTTTGGATTCAGCGACTGCTTTGGAATTCGTTAAGACTCTTCGAAC  
ATCTACAGAGATGACTGGTTCTACTGCTATCGTGGCTATTTACCAAGCTTCTCAATCTA  
TCTACGACATATTTGACAAAGTAGCGGTTCTATATGAAGGACGTCAAATCTATTTCCGA  
AATATTCATGCGGCTAAGGTATGTGGTTTAGATTTTCATTACACTTCGAGATTCCTTTTG  
CCTTTCTTAATATGTGTGATATTTGCGTTTCACCCAGTCGAACAAATGGATGTAGTCA  
TGTCCAATGATATGATTGTGTGATAGAAATGGACTTGTCTATCAAACAAAAGTGCTAT  
AGTACAGTACTGTACAGCATCATGGAGAACGATTGGAACGAGAGATCAGTGATCTGAT  
AAAAGAAATCTTCCGTGATCTTGGTTGGGAATTCACATAACATAGATGCGTTTTTTTAG  
ACCTTTTTTCATCAACCTAGGATTTGACTGCCACCGCGACAAACTACAGCCGATTTCC  
TCACTTCTTACTAGTCCC GCGGAACGAATTGTGCGACCTGGTTTTCGAAGGCAGAA  
CTCCCTATACCCCTGATGAATTCGCCGCAGTTTGGCAAAAAGAGTGAAGATAGAGCGC  
AACTACTTCGGGAGATCGATGAGTTTGATGCTGATTATCCCCTTGGTGGTCCATCGCTC  
GGGGCTTTCAAACATCCAGGAAAGCTGCGCAAGCCAGAGGCCAGCGTCTTAAGTC  
GCCTTACACAATTTCCGTACCTATGCAGATTAAGTTATGTTTGGAGAGAGGTTTCCAA  
CGTCTACGTGGTGTATGACGATCTTTTTGAGCGGTGTTATTGGTCAATGTGTGATGGC  
ATTGATTCTTGGTAGTGTGTTCTACAACCTTTCGGACGATACCAACAGTTTCTATAGTC

GAGGAGCTTTATTGTTCTTTGCTATTTTGATGGCTGCTTTCCAGAGTGCATTGGAGATT  
TTGACCCTCTATGCGCAACGACCGATTGTGGAGAAACATACGAAATACGCCTTTTATC  
GTGAGTACTGCCAATTTCTAGTTCCATTCTTTCTGGTGTCAAATCTTCCCTTCACATTT  
CTTGGCTTCTAAGACATCGATTTTCGCTAACCATCTTTTCCAGATCCATTTGCTGAAGC  
TTGCGCATCCATGTTGTGTGACTTGCCTAACAAGATTTGTACTGCTATTGTGTTTGACC  
TTGTGCTCTACTTTATGACCAATCTACGAAGGACACCGGCGAATTTTTTCGTGTTCTAC  
TTGTTCACTTTGGTTTGCACACTCACGATGTCCATGTTTTTCCGCTCGATTGCTGCACT  
GTCACGGAGTTTGTGAGAGGTAAGCCGCCATCCCTTCTGTGCTTGCTACCCAAGCTAA  
TCCAAGTGCAGGCCATGGCACCTGCCGCAATCTTCATTCTTTCGATTATTACATATAACC  
GGTTTTGCTATTCCAATCAGAGATATGCATCCCTGGTTCCGATGGATCAATTATGTCGAT  
CCAGTCGCTTATGGATTCGAAGCACTCATGGTTAACGAATTTACAATCGAAAGATCC  
CTTGTTCAAGTGTGTTGTGCCATCCGGTCTGGTTATGGAAGTGTCTCCGGAGCAGAA  
GATTTGCTCCGCCACTGGTGCTGCTGCCGGAGCTGACTTCGTTGATGGTGATACATAT  
CTTGAGGTCAACTTTGGCTACAAGTACAGTCATCTTTGGAGGTAAGTTGATTCTGGAC  
ATCCGAAATTTAAATATGCGACTTATGGTTACACAGAACTTGGGTATCATGATAGCCT  
TCACTATCTTTGGAATGGCTGTTTACCTCACCGCAAGCGAATTCATCTCTGCAAAGAA  
GTCCAAGGGAGAAGTGCTACTTTTCAGGCGTGGACGTGTACCCTATGTTTCAAAGTCA  
TCTGACGAGGAATCAAAGGGTGAGGATCGTATGACCACAGAACTGTAACCTCGACAA  
AAAAGTGTCCAGATGCGCCCCCAAGCATTCAAAGCAAAGTGCATTTTCCATTGG  
GACGAAGTCAACTATGATATCAAGATCAAGGGCGAACCAGAAAGGCTGTTGGACGGT  
GTTGATGGCTGGGTAAACCTGGTACTTTGACTGCTCTTATGGTAAGTTCTCTATGATT  
CTTCCCTCGGTGCAATGGCACGAATATCATTCCCTTATATCTCATAAATGATGTACAACGCT  
AACTCATGATTTAGGGTGTCTCTGGTGCCGGAAAACTACTTTACTTGATGTGCTCGC  
TTCTCGTGTGACTATGGGTATTGTTACTGGCCAAATGCTTGTGGATGGTAAGGAGAGA  
GATATTGGTTTCAAAGAAAGACTGGTTACGTTCAACAGCAAGATCTTCACTTGGCTA  
CTTCCACTGTTAGGGAAGCTTTGACTTTTAGCGCTATTCTGCGACAACCGGCCACTAC  
CCCTCACGCTGAAAAGGTTGCTTATGTCGACGAAGTTATCAAGGTCTTGGAGATGGA  
GGCTTATGCCGATGCCATCGTTGGTGTTCCTGGTGAAGGTAGGTTATACTTGGGCGA  
CTCCAATTACTTAAACGTTCTAACATGATTTCAAAGGTCTTAAACGTCGAACAACGTAA  
ACGTCTTACAATTGGTGTGAGCTTGCCGCGAAACCTGCCTTACTTTTGTTCCTCGAT  
GAACCAACATCTGGTCTTGATTCTCAGACTGCCTGGTCTATTTGTGCTTTGCTCAGAA  
AACTCGCAGATAATGGACAGGCTATTCTTTGCACTATTTCATCAACCTTCCGCTATTCTC  
TTCCAGGAATTTGATCGTCTCTTGTCTTAGCCAAGGGTGGTTCGAACGGTATACTTTG  
GTGAAATCGGCAAACACTCGAAAACCTTGACAAACTACTTCGAACGAAATGGTGCCC  
ATCCTTGTGGTGATGTTGCAAATCCTGCTGAATGGATGCTAGAAGGTAAGTCTTTCTAT  
CTTGTGTAATTTAATGCAAACCTAACAAATCAATTAGTTATTGGTGCTGCGCCTGGATC  
TGAAACTACTATCGACTGGCCACAACTTGGAAGAACTCACCTGAACGTCAACAAGT  
CAAAGCTACCTTGGCAGAAATGAAGCAGACTCTTCTGCCAAACCAATCGAGCATGA  
CCCCAATGCACTCAACTCTTTCGCTGTCGGCTTCATGACGCAAATGTGGGTCGTGCTC  
CTACGTGTATTCCAACAATACTGGCGTACTCCATCCTACCTTACTCAAAAAGTCTTCT  
TTGCACGTGCGTTGGTCTTTTCATCGGTTTCTCATTCTGGGATACAAAGACATCTCTTC  
AAGGCATGCAAATCAACTTTTCGCTATTTTCATGCTTCTTACTGTAAGTCTCGATATC  
AATCTTCCAACCTTATAAGCAAAGACTAACCTGGAAGTACTGATCTTCGGTAACCTGGTC  
CAACAAATCATGCCTCATTTCATTACTCAACGTTCTCTGTATGAAGTTCGCGAACGCC  
CATCAAAGACCTATTCATGGAAAGTTTTTCATCCTCTCCAACATCTTTGTTGAGTTGCC  
TGGAATACCCTCATGGCTGTTATCATTTTTCGTCACATGGTACTATCCGATCGGTCTTCA

AAGAAACGCTGAAGCAGCTGGTCAAATTACTGAGCGTAGTGGTTTGATGTTCTTGTA  
CGTTTGGGCATTCTTGATGTTCACTTCTACCTTCACTGATATGGTTGTCGCTGGCATGG  
AAACTGCCGAGAATGCTGGAAACGTTGCCAACTTGTTGTTTACTCTTACATTGATTTT  
CTGCGGGTATGTTCCCTCTCTCCTTTTTGTGCGAAGTAATTAGTTTACTAATCCCACCACA  
GTGTGCTCGCAAGCCCAACCTCCCTTCCCGGTTTCTGGATCTTCATGTACCGCGTATCT  
CCCTTCACTTACCTCGTTAGCGGTATCATGGCCACCGGCCTCGCCAACACCAAAGTCA  
TCTGCTCATCTATCGAATACCTCCACTTCAACCCCCCTCTTCGCAAACATGTGCCGAA  
TACTTGGACCCGTATATCTCATTGCTGGCGGCTACTTGAATAATCCCAACGCGACTAC  
CGATTGCGAGTTCTGCTCTCTTAGCGATACGAATGTTTTCTTGGCGAGCGTGAATAGTT  
ATTATAGTCAGCGCTGGAGGAACTGGGGGTGCTGTGGGTGTTTATTCTCTTCAATATT  
GCGGGGGCCATTGGGCTGTATTGGTTGGCTAGGGTGCCGAAGGGGGCGAGTAAGGG  
GGATAAGGAAGAGGGTGCGAAGGTGGAAGGGGAGAAGAAGAAGTGGTTTAGGAAG  
AAATAG

>ShPDR1\_HRI11

ATGTCTTTATTAGGGAATCTCAACCCTAATCTCAACCAGGGCAATCCACGGTTAGCC  
ATAACATTCCATCCCGCCAATTCCACGATGGGGAGGAAGACATCGAGCTTTCCAATGT  
CAACAAGAGCTACGCCTCCAGCGATACAGCCATCGTGGGCAAGAACGAAGAAGAGG  
ACGGTGCATCCCATATTCCGACTGAAGAACAGCTCAATGCTGATATCGGTCGTTTGGC  
TCGACGACTGACCCAGCACTCAACACGATACTCAACCAATACGAATCTTCCGAACCC  
CTTTCTACTCGACAAAGACGATTGACTTTGAACCCTCACAGTCCAAATTTCAAAGCA  
AGTGACTGGATGAAGATGTTGCTTGAAATTCGATCGAAGGATCCTGAGAGATATCCAA  
AGGGAACAGCGGGTATTGCGTTCAAGAACTTATCTGTGCACGGCTTTGGCAGCCCCA  
CCGACTATCAGAAGGATGTCATTAATACTGTTTTGGAGCTTGGTACTTTGGCTCGTCG  
AGCAATGGGGATCAAGCCGCAGAAGATTCAGATCCTTCGCGATTCGACGGTTTGGT  
ACGGAGTGGAGAAATGCTGATTGTCCTTGGTCGACCTGGGAGTGGATGCACGACATT  
GTTGAAGACAATTGCTGGAGAGACAGGTGGTATTGAAATGGATGAGAAGACCGTTTT  
GAATTATCAAGGTATATATATCCCTTTTATCCTTTTGTGGTTTCAATCGATGGAAATC  
GTGTTTGTGACTTACATTCAACGAAATAGGCATATCAGCAAAAACAATGCACAACCAA  
TTCAAGGGCGAAGCCATCTATTCCGCAGAAACCGACGTTCAATTTCCACAGCTTTCTG  
TTGGTGATACCCTCAGCTTTGCCGCACTTGCACGTGCCCTCGAAACCGATTGCCCGG  
GGTCAGCCGAGAACAATACGCTGAACACATGAGAGATGTGATCATGGCTATGCTGGG  
TCTCTCTCATACTGTCAATACCCGCGTAGGCAACGACTATGTTTCGTGGGGTATCTGGTG  
GAGAGCGCAAACGTGTTAGTATTGCTGAGGCTACGCTCAGTCAAAGTCCACTGCAGT  
GTTGGGATAACAGTACCAGAGGTCTCGACTCCGCCAATGCCCTCGAGTTCTGCAAAA  
CACTCGCTCTAACAGCCAAGTACTCTGGTAGCACAGCCTGTGTTGCTATTTACCAAGC  
CTCGCAGAGTGCTTATGATGTCTTTCACAAAGTCACTGTGCTCTATGAAGGACGACAG  
ATCTTCTTTGGCCGAACCGACAAGGCCAAGGAATTTTTGTGAACATGGGATTCGAGT  
GCCCAGAACGCCAAACCACAGCGGATTCCTAACATCTCTCACCAGTTCCTCAGAAC  
GTGTTGTCCGGAAAGGCTACGAAGGCAAGGTTCCCTCGCACACCTGACGAGTTTGGCG  
CTGCATGGAAGAAGAGTGACGCGTACGCCGAGCTCATGAAGGAAATCGACGAGTAC  
AACAACCAATACCCTATTGGCGGCGAGGCATACGAGCAATTCGTTGAGGCTCGCCGC  
GCAGCGCAAGCTAAGCACCAGCGGTTGAAGTCTCCTTTTACAATTTCCATGGCGCAG  
CAGGTCAAACCTGTGTGTTACTCGTGGTTTCCAGCGCCTCAAGGGAGATGTCAGCTTG  
ACGATGAGTGCTCTTATCGGTAACCTTTATCATGTCTTGATTATTGGCAGCGTATTCTAC  
AATCTTCTGAATCGACTGCAAGCTTTTACTCTCGCGGTGCACTATTATTCTTCGCCGT  
CCTTATGAACGCTTTCGCTAGTGCCTTGGAGATTCTCACCCCTCTATGCCAGCGGCCA



ATTGTGGAGAAGCAGGCCCGATATGCCTTCTGCCACCCCTCTGCAGAGGCGCTTGCG  
TCTATGATTTGCGATATGCCATATAAGATCGTCAACTCTTTCACGTTCAATATCCCATTG  
TATTACATGGCCAATCTGCGCCACGGCGGTGATGTCTTTATGACATTCTGGCTCTTCTC  
ATTTGTTGCAACTCTCACCATGTCTATGATTTTCCGAACATCGCTTCTGCATCTCGCA  
CTCTATCACAGGCTCTTGTGCCCGCTGCGGTATTGATATTGGGCTTGGTCATCTACACT  
GGCTTCACAATTCCTACTCGAAACATGCTGGGTTGGTCAAGGTGGATGAACTATATTG  
ATCCGCTCGCGTATGTCTTTGAAAGTTTGATGGTAAATGAATTCAATGGTCGGACATTT  
CCTTGCTCAGCCATTGTCCCATCTGGAGGCAGCTATGACGGTATATCAATGGACTATCG  
CATCTGCTCTACTGTAGGTGCTGAAGCAGGATCAAATGTTGTGCAAGGTGCCAGCTAT  
CTTGCCAGAGCTTCCAATACTACAAAGGACATGAATGGAGAACTTTGGGATCATCA  
TTGCATTATGCTCTTCTTCATGGCTACCTATCTTCTTGCTACCGAATACATCTCCGAGC  
AGAAGTCCAAAGGGCGAAGTTCTCTTGTTCCGCCGCGGCCACCAGCCTGCTCATGTGCG  
GATCGGATGTTGAGGGTGGTGTGACCGAGACTACGAAAACAGCTGATCAACAAGGC  
GGTGCTGCGATCCAGAGACAAACAGCTATCTTCCACTGGCAGGATGTGTGCTACGAT  
GTTAAGATAAAATCGGAAACCAGACGTATTCTTGACCACGTTGATGGATGGGTGAAG  
CCTGGTACTTGCACAGCATTGATGGGTGTCTCAGGAGCCGGTAAGACGACCTTGTTA  
GACGTCTCGCCACCAGAGTAACCGTGGGTGTGGTCACAGGCGAGATGCTTGTCGAT  
GGCAAACCACGCGACCAGTCATTTCAACGGAAAACCGGCTACGTACAACAACAAGA  
CCTACACTTATCCACCTCGACGGTCCGAGAAGCTCTAGAATTCAGTGCCATTCTCCGT  
CAGCCGGCCATCTCAGTCGCCAAGAGAACTAGACTACGTTGGTGAAGTCATCAAG  
CTACTCGGTATGGAGACGTACGCAGACGCAGTCGTTGGTGTTCGCCGCGAGGGGCTC  
AATGTTGAACAGCGCAAGAGGTTAACTATTGGAGTGGAATTGGCTGCAAAAACCACAA  
CTGTTGTTGTTCCCTTGATGAGCCTACCTCTGGTTTGGATTCTCAAACATCGTGGTCCAT  
TCTCGATCTCATAGATACCTTAACTAAACACGGCCAGGCCATTCTCTGCACTATTCATC  
AGCCTTCGGCTATGTTGTTCCAGCGCTTCGACCGTCTTTTATTCTTAGCTAAGGGTGGA  
CGAACAGTGTACTTTGGTGATATTGGTGAAAACCTCCTCTATTCTTTCCAGTTATTTTGA  
AAGGAACGGCGCCAAGCCTCTATCTCCTGGCGAAAATCCGGCGGAATGGATGTTGGA  
TGTGATCGGTGCCGCGCCAGGGTCTCACAGTGATATCGACTGGCCAGCCGTATGGCGT  
GAAGGGCCCAGCGTGTGCTGTTCCGGGAGCATCTTGCTGAACTGAAGGCAACGCTC  
TCTGGAAAATCATCCAATGATGATGCAGCCCAGGATGATCCCGGCAGCCTAAAGGAAT  
TTGCAGCTCCATTTATGTCCAGCTATACGAATGTCTCCGCCGCGTCTTTGCACAATAC  
TTCCGTACTCCAACCTTATTTGTGGTCCAAGTTCGCCCTCTGCGCTCTTTCCGCCATCTA  
CATCGGATTCTCTTTCTTCCAAGCCAAGAACAGTCTTCAGGGTCTCCAAAACCAAATG  
TTCTCCATCTTCATGCTGATGACCATCTTCGGCAACCTCGTCCAGCAGATCATGCCGC  
ACTTCGTAACCTCAAAGATCCCTCTACGAAGTCCGCGAGCGTCCCTCCAAAACCTACTC  
CTGGCAAGCGTTCATGACCGCCAACATCCTCGTCGAGCTCCCCTGGAACACCCTCAT  
GGCCGCCGTCATCTTCTTCTGCTGGTATTATCCCATCGGACTGTACCGTAAACGCTGAAC  
CCACCCACGCCGTCACCGAGCGCGGGCGGCTCATGTTCTGCTCATCTGGACCTTCTT  
TCTGTTACCTCCACCTTTGCGCATATGATTATCGCGGGGATTGAATTTGCTGAAACCG  
GCGGAAACATCGCCAATTTACTATTCTCTCTGTCTGATCTTCTGCGGTGTGCTCGCC  
ACCCCTGAATCTCTCCCCGGCTTCTGGATCTTCATGTACCGCGTCTCGCCCTTCACTTA  
CCTCGTGTCTGCTATGCTCTCTACCGGTCTCAGCGGGACGACTGTGACTTGCGAAGCG  
GTCGAGTATCTGGGCTTTAATCCCCGGCGAACGAAACCTGTCAGTCCTATATGGCAG  
ACTATGTGGCGCTCGCGGGAGGGTATCTGAAGGATCCGTCGGCGACGAGCGGATGTG  
AGTTCTGCAGTGTGTCGGGCACGGATACGTTTTTGGCATCGGTGTCGAGCCATTTTAG

TGATGCGTGGAGGAATTTGGGTTGATGTGGGTTTATATTATCTTTAATATCTTTGCTGC  
GGTTTTCAATTTATTGGCTTGCTAGGGTGCCAAAGGGGAAACGATCGAAGGTTTGA

>CYP561\_HRI11

ATGTCTTCCCGTATCCCCAACCAACAGTATTACCCAAGCCTCCAGCTGTACGAGTAG  
ACGTGTTCAATTCAGCCGCCTTGTTATTTATTCTCGTAAGTCCAAGATGTCGGAACGAT  
ACATATCAACACTGAACGATGCACTTCATAGGTTTTGCTTTACCGAGTAGGACTGGTC  
TTATATCGGATATATCTTCATCCATTACGTGCAATTCCTGGTCCAAAACCTCTGGGCCGTA  
ACCGACTTGCCCTACACATATACCGTCGATATTGCAGGGACAGGTGTTACATTATCGC  
CAAGCTCCACAGGAAATACGGTCCTGTTATCCGAATAGGGCCTGACCGTCTTGCTCTA  
GATGGTAGCATAGGCTGGCCCCAAGTCTTTGCTCGTCGCACTGATGGAAATGCCGAGT  
TTGAAAAAGCACCGCTGTTCTTCCCTCGCGGAACCGAGCAGTCTATAGCATCGGCAC  
CTAGAGATGTACACCGTCGGCAACGAAGACAACCTGGGCACGCTTTCAGTGACGCAG  
CCATGTATGAGCAGGAAGGTATCCTGAAGAAATACATCCAGCTACTCGTGGATCGCGT  
CCAGCAGCATGCAGACTCTGGGACATCAATGAACATCGTTCAATGGCTCAACTTTACC  
ACTTTCGACATTATCGGGCGATATGACATACGGAGAGTCGTTTGGCTGTCTTGAAAGCA  
GCAAATACCATCCATGGGTTCTTAGCGTTTTTGAAGGCATAAAGAGCGATGCCTTTTC  
ACGAGCTTGCAGGAAGTATCCTACCATCGGCCCTCTAGTTGAGAAATTATTTGGATCA  
AAAAAGGGTGAAGAAAACAATCGTTTGGCCATGGAGAAAGGAAAAGTACGTATGGA  
ACTTAGCACGGAGCCAAACGGTCGCCGTGATTTTCGTGACTTACATGCAACGACCAAG  
TCGCGATGGAACCCAGGTTTCTCAGACGCCGAGATTATGTCTAATTTACCTGTGCTC  
GTTGTTGCCGGCAGTGAAACGACAGCAACCGCATTATCAGGGTTTTTCTTTTACTTGG  
GTCAGACACCTCGTGTGAAGGCAAGAGTCATAAATGAGATCCGGAAAGCATTTC AAG  
ACGAGTCAGAGATTGATTTGATCAGCACTAATAACCTCGAATACTTGCATGCATCAATT  
GAGGAAACTCTGAGAGTATATCCGCCGGCAGGACTTACTCCACCCCGAGCATCACCT  
GGTGCTGAGATCGATGGGAAGTTTGTCCCCCGAGGAGTAAGTCGCTCTTTTAGATTGA  
CCCCCCCCCGGCCCTCAGAAGCTAAATTGTCAGTAGACCGCGGTTTCATGTGATGC  
AATGGGCAACATTTTCGGAACCCAGAACATTTTCTCGAGCCTGACTCTTTCTGTCTGA  
AAGATGGTTAAAGAATACGCATCCACTATATGATGCCAAGTTCGCCAATGACAATCAC  
GAAGTATTCAAACCATTCAGTCATGGCCCTCGCGATTGCATAGGAAAGAACTTGTCTT  
ACGCGGAGATGCGACTGATAGTATCTAAACTCTTGTATAGATTTGATTTCGAACTCCTA  
GCTGGGCAAGATGATTGGCATGCGACTCAAGCCATATACATAACTTGGGAGAAAGGT  
CCACTGTACATAAAGTTCTCTTCCAGAAAACAATGA

>CYP65\_HRI11

ATGTTGTCAGTGGTTGCTCTAATAGCAGCCCTCTATCTTCTTTACTCTTTGATTTACATT  
ATCCGGGTTCTTTACTACCATCCTCTCAGTCACATCCCTGGTCCGACACTATGGATCGC  
TTTTCCAATATTTGTTACCTCGCGTCGATTCGAGGGGAGGCTAGATATCGATCTTCGCG  
CTCTCCACCAGAAATATGGTGAGGCTGTTTCGATTTTCGCCCGATGAGGTATCCTTCATC  
ACCGCCAAGCCTGGCGGGACATTTATGGCCACGGCCACAAGCAACTGCCTAAGTTC  
CAACTCTCAGGTATAAACGGTTTAAATATCATTAGCTCAAATGATATCGACCATACTCG  
ATACCGCAAAGCTATATCTCATGCCTTTTCCGCGAAAGGACTTCAAGCGCAAGAGCCG  
ATCCTGAAAACATACGTGATAAACTTATCACCAAATTGGAGCACCCAGCAAAGTCTC  
AGTTGCCTATAGATATGGTAATGTGGTATAATCTTACAACATTTGATCTCATCGGCGATC  
TTGCCTTTGGTCAATCCTTCGGCGGACTCGAGAACTCACAGTATCACTTCTGGGTCTT  
GACAATTTTCCAATCCATACATACTAGAATTTATCAGACTCAAGGGTATCTATCCTAT  
ATTCTCCCAATTGGTCAAACCTTTTATACCCCGTAGTTTGGCAAACGCACGTCAAACGG  
CAGCTGAACTACAGCAAACCCGCGGTACAAAAGAGGCTTACGAACCATAAGCCCTCC

GACGTTGCAGACTTCATGGATTCCATGCTCCGACATCGCGGCGAGAAAGATAGCCTA  
AGTGATGAGGAGCTAGCAGAAAATGCCAGTATTCTTGTCATCGCTGGCAGCGAAACT  
ACCGCCACGTTGTTGTCGGGGGTAACCTTCTTACTTATGAAGAACCCAGCGGGCGATG  
AAAAGGGTAACGGATGAAGTGCGGTTCGGTCATGCAAACCTGAAGAGGATATCACTTTT  
GCAAACACAACCTGCAAATCTCCCATACATGTTAGCCTGTCTTGATGAGGCCCTTCGAA  
GGTATCCACCGATCCCTACTGGATTGCAACGAGTTACCACTTCGACTACAATTATTTTCG  
GGCTATCAGGTCCCTCCGAACGTAAGATCAGAAGTGTATCGTTATTCCAGAAAAAGTA  
GCTAACAAATCCCCAAAGACTAAAGTAGCTGTTTCATCAATCCGCGGGCGTATCATTCTTC  
TCTCAATTTCCACAAGGCCGAGTGCTATATCCAGAACGCTGGCTCCAGCAGCGAA  
AGACGATCCACAATCGCCATTCTTTAACGATAATCGCGATGTTTTGCAGCCATTCTCTA  
CCGGACCACGTAACCTGCATCGGCCGAAATCTAGCATATAACGAGATGCGCGTCATCCT  
GGCTCGGATAATCTGGAAATTTGACCTTGAATTGTGTCTGAATCTCAGGGCGTGGGAC  
GATCAGAAATCATACACTCTGTGGGACAAGCCCCCGCTGATGTGCAAGTTGACACCG  
AGGCTATATTGA

>CYP68\_HRI11

ATGGAGCCCTTAAAATCTTCAATTGTCCTGTTTCCTAACAGCCTGCCTCCACTTGCCCT  
AAACCCTATCACCCTTCGATATTACTTGCCGCTGTACTTGCAATACTTTTTTTAAGTA  
GGAAATCCAGCAACCTTCCATGCCAATCCTCCATCCTGGTTTTCCCGACAATTATA  
ATGCAGTTAGACGCTGGGAAACGCGGCATGGATATCCTGGATGATGGCCGAAAGAGG  
TTTCTGACAGAGCATTCCGAATGATCAACAACAACGGAGAAATAATTGTTCTCCCAT  
CGCGTTTTGCGCATGTTATCCGCAACGAAGAAGGCTTGAGCTTTGCCGACTCGACCA  
CACGTGTAGGCTCTGTCAATTGTTGTATTCCGAGCCAGAATATACTAATTGTCTAGGAC  
TTCCACGCCCAAGTTTCAGGATTTCGCACCTGTAGGTGTTATAGGTCACCGAGGACAG  
GTATTACAGAATCTTGCTAGAAAGCCACTCACAAACTTCTAAGTAAGTTTGGTCTTA  
GGAACGATTCTACTGAGATACACGGCTAATATGCGTCTGTCTAGATACCGTTACCGAG  
CCCCTAGCTTCTGAAGCTACCTTCGCAGTTGATCGTGTCTTAGGTGATTCCACAGGTA  
AAGCCTTGAGTCCAGGTAGTCTTTTTGCGATCAACATGATCTAATCTGAAGTAGATTG  
GCAAGACACCCTCATTTTGGATTCCATGCTGAACATAATCTCACGTCTTTCGTCGCGT  
GTTTTCTGGGTGACAACTTTGTGCGCAACGAAGATTGGCTCAAGGTCACGAAGGAA  
TATACTGTGGAGATGTTGCCAGCGGCATTA AAACTGACGCTCGTGCCCGTTGGCTTTC  
GATTTCTCCTTCCCATGTTCTCAAACAGTACAGAAGCGTTCGTGAACATCTGCGGCG  
CTCTCAGGAGCTGATCAATCCCGTAATCGAGGAGCGTCGTGTACTGAAAGAACAAGC  
ACGCAGGGCAGGAAAGCCGGTTCCAAAGTTTAATGATGCCATCGAATGGGCCGAAGC  
GGAATGCAATGGTGTGAGCTATGATCCTGCCTGTCTGCAACTCATTCTATCATTGCTG  
CCATACACACCACGTCGGACCTTCTGACAAAGATTATGTTGCAATTGGCCAAACAACC  
CGATCTCATAGACGCCCTACGGCAAGAAATCATTAGTGTTCTTAAAAAGGATGGATGG  
AACAAAACCTCGTTATAACAATATGAAGCTGTTGGACAGCGCAATGAAGGAAGCACAG  
AGACTGATGCCTAACGAGCAGGGTAAGTCCTTGCTTATCCTGCTTTCCGATACCATT  
AACTGACAATTTGAAGTAAGTATGCACCGGATCGCAACCAAAGATGTACAATTGGCG  
GAAGAGAACATCACCATCCACAAGGGGCAGTATGTCGTGGTAGATACCAGGGTGAG  
GACTCAGCCGTGTACGAGAACCCAGAAAAATTCGATATATAACCGCTGGTTGCGCTTGC  
GAGAAACCCCGAGTTTGCTAATAAGGCACACTTTGTCAGCACGAGCCCTGCGCACC  
TAGGGTTTGGACACGGAATACATGCCTGCCCCGGTCGCTTCTTCGCGGCCAATGAGAT  
CAAGATCACACTTTGTTTCTTCTTAAGTATGACTGGAAATTACCTCCTGGAACA  
AATATTA AATGACTACCTTTGGAACCAGCTACATGCTAGATCCGAGGAGTACTTTGA  
GTTCAAGAGAAGGGAAGCAGAAATTGATTTGGAAGTGTGAAGTTTGAGTAG
