# Supplementary material for: A Xenobiotic Detoxification Pathway through Transcriptional Regulation in Filamentous Fungi
Source: PubMed Central journal article supplement (PMC6050962; doi:10.1128/mbio.00457-18), 2018-07-17
Supplement: mbo004183984st1.pdf [file mbo004183984st1.pdf]

**Table S1.** Plasmids and primers used in this study.

| Plasmids                        | Descriptions                                                                                               | Sources              |
|---------------------------------|------------------------------------------------------------------------------------------------------------|----------------------|
| pYHN3-pShEF1 $\alpha$           | Overexpression plasmid                                                                                     | Sang et al. (44)     |
| pYHN3-ptrpC                     | Overexpression plasmid                                                                                     | This study           |
| pYHN3-ptrpC-CYP561              | CYP561 overexpression plasmid                                                                              | This study           |
| pYHN3-ptrpC-CYP65               | CYP65 overexpression plasmid                                                                               | This study           |
| pYHN3-ptrpC-CYP68               | CYP68 overexpression plasmid                                                                               | This study           |
| pYHN3-ptrpC-ShPDR1              | ShPDR1 overexpression plasmid                                                                              | This study           |
| pYHN3-ptrpC-ShatrD              | ShatrD overexpression plasmid                                                                              | This study           |
| Topo- $\Delta$ ShXDR1           | ShXDR1 knock-out plasmid                                                                                   | This study           |
| pYHN3-ptrpC-dsRNAXDR1           | ShXDR1 knock-down plasmid                                                                                  | This study           |
| p415-PtrpC-Cas9-TtrpC-CYC1t     | Plasmid containing a Cas9 endonuclease (Addgene Plasmid #68059)                                            | Matsu-ura et al (50) |
| p426-SNR52p-gRNA.csr-1.Y-SUP4t  | Plasmid containing a gRNA-csr-1 construct (Addgene Plasmid #68060)                                         | Matsu-ura et al (50) |
| p426-SNR52p-gRNA.ShXDR1.Y-SUP4t | Plasmid containing a gRNA-ShXDR1 construct                                                                 | This study           |
| Topo-ShXDR1 <sup>M853</sup>     | Plasmid with the partial region of ShXDR1 <sup>M853</sup>                                                  | This study           |
| pYHN3-MCS                       | Plasmid with multiple cloning sites                                                                        | Sang et al. (44)     |
| pYHN3-ShXDR1 <sup>T853</sup>    | Plasmid with the upstream (1583 bp) and full length of ShXDR1 <sup>T853</sup>                              | This study           |
| NeoR-ShXDR1 <sup>T853</sup>     | Plasmid with the neomycin resistance gene and upstream (1583 bp) and full length of ShXDR1 <sup>T853</sup> | This study           |
| pYHN3-303bp-pShPDR1             | Plasmid with the upstream (303 bp) of ShPDR1                                                               | This study           |
| pYHN3-354bp-pShPDR1             | Plasmid with the upstream (354 bp) of ShPDR1                                                               | This study           |
| pYHN3-479bp-pShPDR1             | Plasmid with the upstream (479 bp) of ShPDR1                                                               | This study           |
| pYHN3-1289bp-pShPDR1            | Plasmid with the upstream (1289bp) of ShPDR1                                                               | This study           |
| pPAD80                          | Plasmid containing HA                                                                                      | Delley and Hall (45) |
| pYHN3-ptrpC-ShXDR1HA            | Plasmid with HA tagged ShXDR1                                                                              | This study           |
| pYES2-atrD                      | Galactose induced ShatrD plasmid                                                                           | This study           |
| pYHN3-ptrpC-TCONS_00005783      | Glutathione S transferase overexpression plasmid                                                           | This study           |

  

| Primer Name                      | Primer Sequence (5'-3') | Descriptions                       |
|----------------------------------|-------------------------|------------------------------------|
| <b>Primers for qPCR analysis</b> |                         |                                    |
| QF_CYP561                        | AGATCGATGGGAAGTTTGTCC   | Quantify expression of CYP561 gene |
| QR_CYP561                        | GTTCTGGGTCCGAAATGTTG    |                                    |
| QF_CYP65                         | ATTCCAGATTATCCGAGCCAG   | Quantify expression of CYP65 gene  |
| QR_CYP65                         | GAGTGCTATATCCAGAACGC    |                                    |
| QF_CYP68                         | CAACCCGATCTCATAGACGC    | Quantify expression of CYP68 gene  |
| QR_CYP68                         | GATCCGGTGCATACTTACCTG   |                                    |

|                                |                                                     |                                               |
|--------------------------------|-----------------------------------------------------|-----------------------------------------------|
| QF_ShXDR1<br>QR_ShXDR1         | GCTAGATCACGAGCTTGAAGAA<br>GACGACAACATGGAGGATCAA     | Quantify expression of<br><i>ShXDR1</i> gene  |
| QF_10618<br>QR_10618           | TGCATCCAGCGTTCTAGTATTC<br>CGAACCAGCAGGTTGTTAGTA     | Quantify expression of<br>TCONS_00010618      |
| QF_3057<br>QR_3057             | AATGGCGGGAGTCTGTTG<br>TCTGATCCAATGCCCAATTCT         | Quantify expression of<br>TCONS_00003057      |
| QF_2727<br>QR_2727             | TCTGCAGTCCGCAACTTATT<br>GGGATCCGATTCATCTGTCTTC      | Quantify expression of<br>TCONS_00002727      |
| QF_23546<br>QR_23546           | CTTCTACCACCACCCTTTCTAC<br>TCGACATCAGCACCGATTATAC    | Quantify expression of<br>TCONS_00023546      |
| QF_5783<br>QR_5783             | GCTCGAGGAGCTTAAAGAAGT<br>AGATGGGAATTCGACCATTAGG     | Quantify expression of<br>TCONS_00005783      |
| QF_YFP<br>QR_YFP               | GCACAAGCTGGAGTACAACATA<br>TGTTGTGGCGGATCTTGAA       | Quantify expression of<br>YFP                 |
| QF_PDR1ChIP<br>QR_PDR1ChIP     | GTGTTTCGATTGTGTTTCGATTGT<br>CTCTCCCATTCCACGGTATTATT | Quantify <i>ShPDR1</i><br>promoter enrichment |
| QF_CYP561ChIP<br>QR_CYP561ChIP | GATGCTGCGTTCTGGTTATTG<br>GCGGCAGCACAAACTTAAA        | Quantify <i>CYP561</i><br>promoter enrichment |
| QF_Bcactin<br>QR_Bcactin       | CTGAGCGTGGTTACACTTTCT<br>TGACTGGCGGTTTGGATT         | Quantify expression of<br><i>Bcactin</i> gene |
| QF_BcatrD<br>QR_BcatrD         | TTCCGGTCTATTGCTTCACTATC<br>GGGACCGCAAATCCAGTATAA    | Quantify expression of<br><i>BcatrD</i> gene  |
| QF_BcCYP65<br>QR_BcCYP65       | GCTATGTCTCATGCCTTCTCTG<br>TCGCTTCGTGCTCCAATTTA      | Quantify expression of<br><i>BcCYP65</i> gene |

#### Primers for generation of different types of mutants

|                                                 |                                                                                            |                                                  |
|-------------------------------------------------|--------------------------------------------------------------------------------------------|--------------------------------------------------|
| F_ApaI_ptrpC<br>R_NcoI_ptrpC                    | ATTTGGGCCCGTTAACTGATATTGAAGGA<br>ATTCCCATGGTTGGATGCTTGGGTAGAATA                            | Amplification of<br>ptrpC from pYHN3<br>vector   |
| F_KpnI_CYP561<br>R_SpeI_CYP561                  | ATGTGGTACCATGTCTTCCCGTATCCCCAA<br>GCGCACTAGTTCATTGTTTTCTGGAAGAGAACTTTATGTAC<br>AGTG        | Amplification of<br><i>CYP561</i> gene           |
| F_NcoI_CYP65<br>R_SacI_CYP65                    | ATGTCCATGGATGTTGTCTAGTGGTTGCTCT<br>ATGTGAGCTCTCAATATAGCCTCGGTGTCA                          | Amplification of<br>CYP65 gene                   |
| F_KpnI_CYP68<br>R_NotI_CYP68                    | ATGCGGTACCATGGAGCCCTTAAAATCTTCAATTGTCCTG<br>ATGCGCGGCCGCTACTCAAACCTTCAACACTT               | Amplification of<br>CYP68 gene                   |
| F_KpnI_ShPDR1<br>R_SpeI_ShPDR1                  | ATGCGGTACCATGTCTTTATTAGGGAATCTCAACCCTAAT<br>ATGCACTAGTTCAAACCTTCGATCGTTTTCCC               | Amplification of<br><i>ShPDR1</i> gene           |
| F_SacI_ShatrD<br>R_NotI_ShatrD<br>R_XhoI_ShatrD | ATGCGAGCTCATGGCGACCTCGACAC<br>ATTTGCGGCCGCTATTTCTTCTAAACCACT<br>ATGCCTCGAGCTATTTCTTCTAAACC | Amplification of<br><i>ShatrD</i> gene           |
| F_SacI_upXDR1<br>R_SpeI_upXDR1                  | ATAAGAGCTCTGCCATGCGAATAAGGA<br>ACGCACTAGTCACTAATTATCGCATAGTAT                              | Amplification of<br>upstream of<br><i>ShXDR1</i> |

|                                                                                                |                                                                                                                                                                       |                                                                                                |
|------------------------------------------------------------------------------------------------|-----------------------------------------------------------------------------------------------------------------------------------------------------------------------|------------------------------------------------------------------------------------------------|
| F_NotI_downXDR1<br>R_ApaI_downXDR1                                                             | ATTTGCGGCCGCGAGTTCGGTTTTAGCA<br>ATACGGGCCACTCTTCGCATTCTCGTCC                                                                                                          | Amplification of downstream of <i>ShXDR1</i>                                                   |
| F_upXDR1<br>R_YG                                                                               | TGCCATGCGAATAAGGAGATGTTCCG<br>GGATGCCTCCGCTCGAAGTA                                                                                                                    | Amplification of the upstream of <i>ShXDR1</i> and split marker                                |
| F_HY<br>R_downXDR1                                                                             | CGTTGCAAGACCTGCCTGAA<br>ACTCTTCGCATTCTCGTCCCGGTTCC                                                                                                                    | Amplification of the downstream of <i>ShXDR1</i> and split marker                              |
| F_ApaI_upXDR1<br>R_NotI_ShXDR1                                                                 | ATTTGGGCCCTTGTCATCTCTTACGGGAAT<br>ATGCGCGGCCGCTTACATTCCACCTTGATGTTG                                                                                                   | Amplification of the 1581bp of upstream region and full length of <i>ShXDR1</i>                |
| F_SacI_XDR1SNP<br>R_SpeI_XDR1SNP                                                               | ATAAGAGCTCGATTGGTTATATGTTAGACAAGG<br>ACGCACTAGTTTACATTCCACCTTGATGTTG                                                                                                  | Amplification of the partial sequences of <i>ShXDR1</i>                                        |
| F_XDR1SNP                                                                                      | GATTGGTTATATGTTAGACAAGGATATCTG                                                                                                                                        | Amplification of the partial sequences of <i>ShXDR1</i> and split marker with R_YG             |
| F_det_upXDR1                                                                                   | CACTGAAGTCGATGGCGTCTATCTA                                                                                                                                             | Amplification with R_YG to confirm HRI11( $\Delta$ ShXDR1)                                     |
| R_det_downXDR1                                                                                 | TCCGTCAACCTAACCATGCC                                                                                                                                                  | Amplification with F_HY to confirm HRI11( $\Delta$ ShXDR1) and HRI11 (ShXDR1 <sup>M853</sup> ) |
| F_KpnI_00005783<br>R_NotI_00005783                                                             | GCCGGGTACCATGTCTTCCAGTTTCTACCTTG<br>ATTTGCGGCCGCTACTTGGCCTGCCATTCT                                                                                                    | Amplification of TCONS_00005783                                                                |
| F_AscI_dsXDR1<br>R_SwaI_dsXDR1                                                                 | ATACGGCGCGCCCCCACCACAGATCTTCGGGG<br>GGCCATTTAAATCGTACAAGCGGGTAGTTTTCCATC                                                                                              | Amplification of the sense of <i>ShXDR1</i> fragment                                           |
| F_BamHI_dsXDR1<br>R_SpeI_dsXDR1                                                                | ATCGGGATCCCGTACAAGCGGGTAGTTT<br>ATGCACTAGTCCCCACCACAGATCTTCG                                                                                                          | Amplification of the antisense <i>ShXDR1</i> fragment                                          |
| F_KpnI_ShXDR1<br>R_BamHI_ShXDR1                                                                | ATGCGGTACCATGATGGACTCCATGCATCGTGAAAGGAAT<br>ATGCGGATCCCATCCACCTTGATGTTGCA                                                                                             | Amplification of <i>ShXDR1</i> without stop codon                                              |
| R_NotI_ShXDR1HA                                                                                | ATTTGCGGCCGCTTAAGCGTAATCTGGAACGTCATAT                                                                                                                                 | Amplification of HA tagged <i>ShXDR1</i> with F_KpnI_ShXDR1                                    |
| F_SacI_1289upPDR1<br>F_SacI_479upPDR1<br>F_SacI_354upPDR1<br>F_SacI_303upPDR1<br>R_NcoI_upPDR1 | ATTTGAGCTCGAGGAGGAGCTTCGTGGAGC<br>AGCGGAGCTCTGCATATGAAGTTGTTCTAT<br>ATCGGAGCTCTGGAATGGGAGAGTTCCCTC<br>ATCGGAGCTCTGGAATGGGCACCAGAAAT<br>AGCGCCATGGGATGTGCTAGTCAGAGGATA | Amplification of different lengths of <i>ShPDR1</i> promoter                                   |

|               |                                           |                                                                                  |
|---------------|-------------------------------------------|----------------------------------------------------------------------------------|
| F_NheI_SNR52p | TTGGGCTAGCGGTAAAGGTGCGCATTTTTT            | To insert gRNA-ShXDR1 target sequence into the vector containing gRNA constructs |
| R_gRNA_XDR1   | ACATACCCAGGTCTGTTTCGCGATCATTTATCTTTCACTGC |                                                                                  |
| F_gRNA_XDR1   | GCGAACAGACCTGGGTATGTGTTTTAGAGCTAGAAATAGC  |                                                                                  |
| R_KpnI_CYC1t  | ATTGGGTACCGGCCGCAAATTAAGCC                |                                                                                  |

**Primers for amplification and sequencing of partial sequence of *ShXDR1* gene**

|           |                           |
|-----------|---------------------------|
| F1_ShXDR1 | ATTGTGACCTCACGAAGAGTTGTA  |
| R1_ShXDR1 | TCATATCAGAAAGTGCTTCTACCG  |
| F2_ShXDR1 | CACATCTCCGGAACAAAGTACC    |
| R2_ShXDR1 | CGATACTATGCGATAACCGAATG   |
| F3_ShXDR1 | GCCACCTAGTACCAAAAAGATGAAG |
| R3_ShXDR1 | TCACTAATGCAGAAACAGGAAAGT  |
| F4_ShXDR1 | TCGACTTTCCAATTATGCTATTCA  |
| R4_ShXDR1 | GAGTTTCTAGTAAATGCGCCTCA   |

---
